# Supplementary material for: Sources of Variation in Food-Related Metabolites during Pregnancy
Source: MDPI journal article supplement (doi:10.3390/nu14122503), 2022-06-16
Supplement: s1 [file s1]

**Table S1: Results from ordinary least squares regression examining the association of dietary and non-dietary factors with food-based metabolites**

|                                                                     | <b>Hippuric acid</b>    | <b>Carnitine</b>          |
|---------------------------------------------------------------------|-------------------------|---------------------------|
| <b>Variable</b>                                                     | <b>b (95% CI)</b>       | <b>b (95% CI)</b>         |
| <b>Age (years)</b>                                                  | 0.01<br>(-0.01, 0.03)   | 0.00<br>(-0.00, 0.00)     |
| <b>Gestational age (weeks)</b>                                      | 0.01<br>(-0.01, 0.03)   | -0.01**<br>(-0.02, -0.01) |
| <b>Parity</b>                                                       | 0.03<br>(-0.05, 0.11)   | 0.00<br>(-0.01, 0.02)     |
| <b>Gestational diabetes (GDM)</b>                                   | 0.06<br>(-0.10, 0.23)   | 0.02<br>(-0.02, 0.05)     |
| <b>Pre-pregnancy BMI (kg/m<sup>2</sup>)</b>                         | -0.01<br>(-0.03, 0.00)  | 0.00<br>(-0.00, 0.00)     |
| <b>Smoking history (ever vs. never smoked)</b>                      | -0.13<br>(-0.29, 0.03)  | 0.06*<br>(0.02, 0.10)     |
| <b>Physical activity (low vs. high)</b>                             | 0.02<br>(-0.11, 0.15)   | -0.01<br>(-0.04, 0.02)    |
| <b>Social disadvantage index</b>                                    | -0.02<br>(-0.08, 0.04)  | 0.00<br>(-0.01, 0.01)     |
| <b>Fiber intake (g/day)</b>                                         | 0.01<br>(-0.00, 0.02)   | 0.00<br>(-0.00, 0.00)     |
| <b>Energy intake (kcal)</b>                                         | 0.00*<br>(-0.00, -0.00) | 0.00<br>(-0.00, 0.00)     |
| <b>FFQ before blood draw vs. FFQ at the same time as blood draw</b> | 0.10<br>(-0.07, 0.26)   | 0.01<br>(-0.03, 0.05)     |
| <b>FFQ after blood draw vs. FFQ at the same time as blood draw</b>  | 0.08<br>(-0.18, 0.34)   | 0.06<br>(-0.07, 0.19)     |
| <b>Ethnicity (White European vs. South Asian)</b>                   | 0.04<br>(-0.18, 0.26)   | -0.02<br>(-0.07, 0.04)    |
| <b>Fruits and vegetables (servings/day)</b>                         | 0.22*<br>(0.08, 0.36)   |                           |
| <b>Tea (servings/day)</b>                                           | 0.01<br>(-0.01, 0.04)   |                           |
| <b>Coffee (servings/day)</b>                                        | 0.02<br>(-0.00, 0.04)   |                           |
| <b>Red meat (servings/day)</b>                                      |                         | 0.00<br>(-0.00, 0.01)     |

\*p ≤ 0.01, \*\*p ≤ 0.001

**Table S2: Results of model fitting analyses examining the association of dietary and non-dietary factors with food metabolites**

|                           | <b>-2 Log L</b> | <b>BIC</b> | <b>AIC</b> | <b>S<sub>b</sub><sup>2</sup></b> | <b>S<sub>w</sub><sup>2</sup></b> |
|---------------------------|-----------------|------------|------------|----------------------------------|----------------------------------|
| <b>Proline Betaine</b>    |                 |            |            |                                  |                                  |
| <b>Model 1</b>            | —               | —          | —          | 0.14                             | 0.13                             |
| <b>Model 2</b>            | 2100.0          | 2101.4     | 2104.0     | 0.02                             | 0.11                             |
| <b>Model 3</b>            | 1779.0          | 1780.4     | 1783.0     | 0.20                             | 0.12                             |
| <b>Hippuric acid</b>      |                 |            |            |                                  |                                  |
| <b>Model 1</b>            | —               | —          | —          | 0.00                             | 0.03                             |
| <b>Model 2</b>            | 1394.7          | 1395.3     | 1396.7     | 0.00                             | 0.03                             |
| <b>Model 3</b>            | 1182.1          | 1182.8     | 1184.1     | 0.00                             | 0.03                             |
| <b>3-methylhistidine</b>  |                 |            |            |                                  |                                  |
| <b>Model 1</b>            | —               | —          | —          | 0.07                             | 0.01                             |
| <b>Model 2</b>            | 515.3           | 518.8      | 525.3      | 0.02                             | 0.01                             |
| <b>Model 3</b>            | 496.0           | 497.4      | 500.0      | 0.02                             | 0.01                             |
| <b>Carnitine</b>          |                 |            |            |                                  |                                  |
| <b>Model 1</b>            | —               | —          | —          | 0.00                             | 0.00                             |
| <b>Model 2</b>            | -387.0          | -385.6     | -383.0     | 0.00                             | 0.00                             |
| <b>Model 3</b>            | -298.6          | -297.9     | -296.6     | 0.00                             | 0.00                             |
| <b>Tryptophan betaine</b> |                 |            |            |                                  |                                  |
| <b>Model 1</b>            | —               | —          | —          | 0.03                             | 0.00                             |
| <b>Model 2</b>            | -588.1          | -586.7     | -584.1     | 0.02                             | 0.00                             |
| <b>Model 3</b>            | -489.4          | -488.0     | -485.4     | 0.02                             | 0.00                             |
| <b>TMAO</b>               |                 |            |            |                                  |                                  |
| <b>Model 1</b>            | —               | —          | —          | 0.07                             | 0.04                             |
| <b>Model 2</b>            | 1421.5          | 1422.9     | 1425.5     | 0.02                             | 0.03                             |
| <b>Model 3</b>            | 1211.1          | 1211.8     | 1213.1     | 0.00                             | 0.04                             |

AIC = Akaike Information Criterion, BIC = Bayesian Information Criterion, -2 Log L = -2 log likelihood, S<sub>b</sub><sup>2</sup> = Sum of square between, S<sub>w</sub><sup>2</sup> = Sum of square within

Model 1: Unconditional (intercept only) model

Model 2: Random Intercept with Fixed Level-1 Factors (dietary factors)

Model 3: Random Intercept with Fixed Level-1 Factors (dietary and non-dietary factors)

**Table S3: Results from ordinary least squares regression examining the association of dietary and non-dietary factors with food-based metabolites in FAMILY cohort**

|                                                                             | <b>Proline<br/>betaine</b> | <b>Hippuric<br/>acid</b> | <b>3-Methyl<br/>histidine</b> | <b>Carnitine</b>          | <b>Tryptophan<br/>betaine</b> | <b>TMAO</b>            |
|-----------------------------------------------------------------------------|----------------------------|--------------------------|-------------------------------|---------------------------|-------------------------------|------------------------|
| <b>Variable</b>                                                             | <b>b (95% CI)</b>          | <b>b (95% CI)</b>        | <b>b (95% CI)</b>             | <b>b (95% CI)</b>         | <b>b (95% CI)</b>             | <b>b (95% CI)</b>      |
| <b>Age (years)</b>                                                          | 0.06**<br>(0.02, 0.10)     | 0.02<br>(-0.01, 0.04)    | 0.00<br>(-0.01, 0.02)         | 0.00<br>(-0.00, 0.01)     | 0.00<br>(-0.00, 0.00)         | 0.02<br>(-0.01, 0.04)  |
| <b>Gestational age (weeks)</b>                                              | 0.02<br>(-0.02, 0.10)      | 0.00<br>(-0.02, 0.02)    | 0.01<br>(-0.01, 0.02)         | -0.01***<br>(-0.02, 0.01) | 0.00<br>(-0.00, 0.00)         | 0.01<br>(-0.01, 0.04)  |
| <b>Parity</b>                                                               | -0.06<br>(-0.26, 0.15)     | -0.02<br>(-0.11, 0.08)   | 0.00<br>(-0.07, 0.07)         | -0.01<br>(-0.03, 0.01)    | -0.01<br>(-0.02, 0.00)        | -0.04<br>(-0.12, 0.05) |
| <b>Gestational diabetes (GDM)</b>                                           | -0.15<br>(-0.65, 0.35)     | 0.01<br>(-0.23, 0.24)    | 0.06<br>(-0.07, 0.19)         | 0.03<br>(-0.02, 0.08)     | -0.01<br>(-0.04, 0.02)        | -0.07<br>(-0.29, 0.15) |
| <b>Pre-pregnancy BMI (kg/m<sup>2</sup>)</b>                                 | -0.03*<br>(-0.06, -0.00)   | -0.01<br>(-0.03, 0.01)   | -0.00<br>(-0.01, 0.00)        | -0.00<br>(-0.01, 0.00)    | 0.00<br>(-0.00, 0.00)         | -0.01<br>(-0.02, 0.01) |
| <b>Smoking history<br/>(ever vs. never smoked)</b>                          | -0.53**<br>(-0.91, 0.14)   | -0.10<br>(-0.26, 0.07)   | 0.03<br>(-0.07, 0.13)         | 0.06**<br>(0.02, 0.10)    | 0.00<br>(-0.02, 0.00)         | 0.01<br>(-0.17, 0.19)  |
| <b>Physical activity<br/>(low vs. high)</b>                                 | 0.06<br>(-0.31, 0.43)      | -0.02<br>(-0.18, 0.14)   | -0.05<br>(-0.15, 0.06)        | -0.02<br>(-0.06, 0.03)    | 0.00<br>(-0.03, 0.02)         | -0.02<br>(-0.21, 0.18) |
| <b>Social disadvantage index</b>                                            | -0.03<br>(-0.22, 0.17)     | -0.01<br>(-0.10, 0.07)   | 0.00<br>(-0.04, 0.05)         | -0.00<br>(-0.02, 0.01)    | 0.00<br>(-0.01, 0.01)         | 0.04<br>(-0.03, 0.11)  |
| <b>Fiber intake<br/>(g/day)</b>                                             | -0.00<br>(-0.03, 0.02)     | 0.01<br>(-0.00, 0.02)    | -0.00<br>(-0.01, 0.01)        | 0.00<br>(-0.00, 0.00)     | 0.00<br>(-0.00, 0.00)         | 0.00<br>(-0.01, 0.02)  |
| <b>Energy intake (kcal)</b>                                                 | -0.00<br>(-0.00, 0.00)     | -0.00*<br>(-0.00, -0.00) | -0.00<br>(0.00, 0.00)         | -0.00<br>(-0.00, 0.00)    | 0.00<br>(-0.00, 0.00)         | -0.00<br>(-0.00, 0.00) |
| <b>FFQ before blood draw<br/>vs. FFQ at the same time as<br/>blood draw</b> | 0.06<br>(-0.29, 0.40)      | 0.09<br>(-0.09, 0.26)    | -0.06<br>(-0.16, 0.05)        | 0.02<br>(-0.02, 0.06)     | -0.01<br>(-0.03, 0.02)        | 0.10<br>(-0.08, 0.28)  |
| <b>FFQ after blood draw vs. FFQ<br/>at the same time as blood draw</b>      | 0.08<br>(-0.70, 0.86)      | -0.02<br>(-0.46, 0.41)   | 0.10<br>(-0.30, 0.50)         | 0.05<br>(-0.10, 0.21)     | -0.02<br>(-0.11, 0.06)        | -0.14<br>(-0.72, 0.45) |

|                                                 |                         |                         |                       |                       |                       |                        |
|-------------------------------------------------|-------------------------|-------------------------|-----------------------|-----------------------|-----------------------|------------------------|
| <b>Citrus food<br/>(servings/day)</b>           | 0.40***<br>(0.24, 0.57) |                         |                       |                       |                       |                        |
| <b>Fruits and vegetables<br/>(servings/day)</b> |                         | 0.30***<br>(0.16, 0.45) |                       |                       |                       |                        |
| <b>Tea<br/>(servings/day)</b>                   |                         | 0.00<br>(-0.02, 0.03)   |                       |                       |                       |                        |
| <b>Coffee<br/>(servings/day)</b>                |                         | 0.01<br>(-0.01, 0.04)   |                       |                       |                       |                        |
| <b>Chicken<br/>(servings/day)</b>               |                         |                         | 0.03<br>(-0.00, 0.06) |                       |                       |                        |
| <b>Red meat<br/>(servings/day)</b>              |                         |                         | 0.01<br>(-0.03, 0.05) | 0.02*<br>(0.00, 0.04) |                       | 0.04<br>(-0.02, 0.10)  |
| <b>Eggs<br/>(servings/day)</b>                  |                         |                         | 0.03<br>(-0.00, 0.06) |                       |                       | 0.03<br>(-0.04, 0.10)  |
| <b>Nuts and legumes<br/>(servings/day)</b>      |                         |                         | 0.06*<br>(0.00, 0.12) |                       | 0.02*<br>(0.00, 0.04) |                        |
| <b>Canned fish<br/>(servings/day)</b>           |                         |                         |                       |                       |                       | 0.02<br>(-0.01, 0.06)  |
| <b>Fried fish<br/>(servings/day)</b>            |                         |                         |                       |                       |                       | 0.02<br>(-0.02, 0.07)  |
| <b>Seafood<br/>(servings/day)</b>               |                         |                         |                       |                       |                       | 0.07**<br>(0.02, 0.11) |

\*p ≤ 0.05, \*\*p ≤ 0.01, \*\*\*p ≤ 0.001

**Table S4: Results from ordinary least squares regression examining the association of dietary and non-dietary factors with food-based metabolites in START cohort**

|                                                                             | <b>Proline<br/>betaine</b> | <b>Hippuric<br/>acid</b> | <b>3-Methyl<br/>histidine</b> | <b>Carnitine</b>           | <b>Tryptophan<br/>betaine</b> | <b>TMAO</b>            |
|-----------------------------------------------------------------------------|----------------------------|--------------------------|-------------------------------|----------------------------|-------------------------------|------------------------|
| <b>Variable</b>                                                             | <b>b (95% CI)</b>          | <b>b (95% CI)</b>        | <b>b (95% CI)</b>             | <b>b (95% CI)</b>          | <b>b (95% CI)</b>             | <b>b (95% CI)</b>      |
| <b>Age (years)</b>                                                          | -0.01<br>(-0.07, 0.04)     | -0.01<br>(-0.04, 0.02)   | 0.00<br>(-0.01, 0.01)         | -0.00<br>(-0.01, 0.00)     | 0.00<br>(-0.01, 0.01)         | 0.03<br>(-0.01, 0.06)  |
| <b>Gestational age (weeks)</b>                                              | 0.02<br>(-0.08, 0.13)      | 0.05<br>(-0.01, 0.11)    | -0.00<br>(-0.03, 0.02)        | -0.02***<br>(-0.03, -0.01) | -0.01<br>(-0.02, 0.00)        | 0.02<br>(-0.03, 0.07)  |
| <b>Parity</b>                                                               | -0.18<br>(-0.45, 0.10)     | 0.11<br>(-0.02, 0.24)    | -0.03<br>(-0.09, 0.04)        | 0.03<br>(-0.00, 0.06)      | -0.01<br>(-0.04, 0.03)        | 0.07<br>(-0.06, 0.21)  |
| <b>Gestational diabetes (GDM)</b>                                           | 0.18<br>(-0.18, 0.55)      | 0.09<br>(-0.14, 0.32)    | -0.02<br>(-0.11, 0.07)        | 0.01<br>(-0.03, 0.06)      | 0.04<br>(-0.00, 0.09)         | 0.05<br>(-0.18, 0.27)  |
| <b>Pre-pregnancy BMI (kg/m<sup>2</sup>)</b>                                 | 0.01<br>(-0.04, 0.05)      | -0.02<br>(-0.05, 0.00)   | -0.01<br>(-0.02, 0.00)        | 0.00<br>(-0.00, 0.01)      | 0.00<br>(-0.00, 0.01)         | -0.02<br>(-0.04, 0.01) |
| <b>Physical activity<br/>(low vs. high)</b>                                 | -0.57*<br>(-0.12, 0.03)    | -0.05<br>(-0.27, 0.17)   | -0.01<br>(-0.11, 0.09)        | -0.00<br>(-0.05, 0.05)     | 0.03<br>(-0.02, 0.08)         | -0.04<br>(-0.36, 0.28) |
| <b>Social disadvantage<br/>index</b>                                        | -0.05<br>(-0.18, 0.09)     | -0.03<br>(-0.10, 0.05)   | -0.00<br>(-0.04, 0.03)        | 0.01<br>(-0.01, 0.02)      | -0.00<br>(-0.02, 0.02)        | -0.07<br>(-0.15, 0.01) |
| <b>Fiber intake<br/>(g/day)</b>                                             | 0.01<br>(-0.02, 0.04)      | 0.01<br>(-0.01, 0.03)    | -0.00<br>(-0.01, 0.00)        | -0.00<br>(-0.01, 0.00)     | 0.00**<br>(0.00, 0.01)        | -0.00<br>(-0.02, 0.01) |
| <b>Energy intake (kcal)</b>                                                 | -0.00<br>(-0.00, 0.00)     | 0.00*<br>(0.00, 0.00)    | 0.00<br>(-0.00, 0.00)         | 0.00**<br>(0.00, 0.00)     | -0.00*<br>(-0.00, -0.00)      | 0.00<br>(-0.00, 0.00)  |
| <b>FFQ before blood draw vs.<br/>FFQ at the same time as blood<br/>draw</b> | -0.76<br>(-1.58, 0.07)     | 0.24<br>(-0.25, 0.72)    | 0.00<br>(-0.18, 0.19)         | 0.05<br>(-0.14, 0.05)      | -0.01<br>(-0.08, 0.05)        | 0.02<br>(-0.37, 0.41)  |
| <b>FFQ after blood draw vs. FFQ<br/>at the same time as blood draw</b>      | 0.94**<br>(0.29, 1.59)     | 0.14<br>(-0.23, 0.50)    | -0.07<br>(-0.28, 0.13)        | 0.06<br>(-0.14, 0.27)      | -0.06<br>(-0.24, 0.12)        | -0.19<br>(-0.64, 0.26) |
| <b>Citrus food<br/>(servings/day)</b>                                       | 0.18***<br>(0.17, 0.28)    |                          |                               |                            |                               |                        |

|                                                 |  |                       |                        |                        |                       |                        |
|-------------------------------------------------|--|-----------------------|------------------------|------------------------|-----------------------|------------------------|
| <b>Fruits and vegetables<br/>(servings/day)</b> |  | 0.11<br>(-0.09, 0.30) |                        |                        |                       |                        |
| <b>Tea<br/>(servings/day)</b>                   |  | 0.03<br>(-0.02, 0.08) |                        |                        |                       |                        |
| <b>Coffee<br/>(servings/day)</b>                |  | 0.02<br>(-0.04, 0.07) |                        |                        |                       |                        |
| <b>Chicken<br/>(servings/day)</b>               |  |                       | -0.00<br>(-0.03, 0.03) |                        |                       |                        |
| <b>Red meat<br/>(servings/day)</b>              |  |                       | 0.06**<br>(0.02, 0.10) | -0.00<br>(-0.01, 0.01) |                       | 0.00<br>(-0.06, 0.06)  |
| <b>Eggs<br/>(servings/day)</b>                  |  |                       | -0.01<br>(-0.02, 0.01) |                        |                       | 0.00<br>(-0.03, 0.07)  |
| <b>Nuts and legumes<br/>(servings/day)</b>      |  |                       | -0.05<br>(-0.11, 0.01) |                        | 0.02<br>(-0.01, 0.05) |                        |
| <b>Canned fish<br/>(servings/day)</b>           |  |                       |                        |                        |                       | -0.08<br>(-0.24, 0.07) |
| <b>Fried fish<br/>(servings/day)</b>            |  |                       |                        |                        |                       | -0.00<br>(-0.08, 0.07) |
| <b>Seafood<br/>(servings/day)</b>               |  |                       |                        |                        |                       | 0.11*<br>(0.01, 0.21)  |

\*p ≤ 0.05, \*\*p ≤ 0.01, \*\*\*p ≤ 0.001

**Table S5: Results from ordinary least squares regression examining the association of dietary and non-dietary factors with serum non-esterified fatty acid (NEFA) in FAMILY cohort**

|                                                                         | <b>ω-3 PUFA</b>                         |                                         |                                         |
|-------------------------------------------------------------------------|-----------------------------------------|-----------------------------------------|-----------------------------------------|
|                                                                         | <b>EPA</b>                              | <b>DHA</b>                              | <b>EPA + DHA</b>                        |
| <b>Variable</b>                                                         | <b>b (95% CI)</b>                       | <b>b (95% CI)</b>                       | <b>b (95% CI)</b>                       |
| <b>Age (years)</b>                                                      | -0.01<br>(-0.02, 0.00)                  | -2.92×10 <sup>-3</sup><br>(-0.01, 0.01) | -0.01<br>(-0.02, 0.00)                  |
| <b>Gestational age (weeks)</b>                                          | -0.01<br>(-0.03, 0.00)                  | -0.01*<br>(-0.02, -0.00)                | -0.01*<br>(-0.02, -0.00)                |
| <b>Parity</b>                                                           | -0.01<br>(-0.07, 0.06)                  | -0.05*<br>(-0.09, -0.00)                | -0.03<br>(-0.08, 0.02)                  |
| <b>Gestational diabetes (GDM)</b>                                       | -0.06<br>(-0.22, 0.10)                  | -0.06<br>(-0.17, 0.05)                  | -0.07<br>(-0.18, 0.05)                  |
| <b>Pre-pregnancy BMI (kg/m<sup>2</sup>)</b>                             | -3.34×10 <sup>-3</sup><br>(-0.01, 0.01) | -0.01**<br>(-0.02, -0.00)               | -0.01<br>(-0.01, 0.00)                  |
| <b>Smoking history<br/>(ever vs. never smoked)</b>                      | -0.01<br>(-0.13, 0.11)                  | -0.04<br>(-0.13, 0.04)                  | -0.03<br>(-0.12, 0.05)                  |
| <b>Physical activity<br/>(low vs. high)</b>                             | -0.03<br>(-0.18, 0.12)                  | -0.02<br>(-0.12, 0.08)                  | -0.02<br>(-0.13, 0.09)                  |
| <b>Social disadvantage index</b>                                        | 0.03<br>(-0.04, 0.10)                   | 0.03<br>(-0.01, 0.07)                   | 0.03<br>(-0.02, 0.08)                   |
| <b>Fiber intake<br/>(g/day)</b>                                         | 0.01<br>(-0.00, 0.01)                   | 3.71×10 <sup>-3</sup><br>(-0.00, 0.01)  | 4.88×10 <sup>-3</sup><br>(-0.00, 0.01)  |
| <b>Energy intake (kcal)</b>                                             | -7.71×10 <sup>-5</sup><br>(-0.00, 0.00) | -3.76×10 <sup>-5</sup><br>(-0.00, 0.00) | -5.39×10 <sup>-5</sup><br>(-0.00, 0.00) |
| <b>FFQ before blood draw vs. FFQ at<br/>the same time as blood draw</b> | -0.01<br>(-0.15, 0.13)                  | 0.04<br>(-0.05, 0.13)                   | 0.02<br>(-0.08, 0.11)                   |
| <b>FFQ after blood draw vs. FFQ at<br/>the same time as blood draw</b>  | 0.06<br>(-0.26, 0.39)                   | 0.25<br>(-0.04, 0.54)                   | 0.17<br>(-0.11, 0.44)                   |
| <b>Fish<br/>(servings/day)</b>                                          | 0.02<br>(-0.01, 0.05)                   | 0.04**<br>(0.01, 0.06)                  | 0.03*<br>(0.01, 0.05)                   |

\*p ≤ 0.05, \*\*p ≤ 0.01

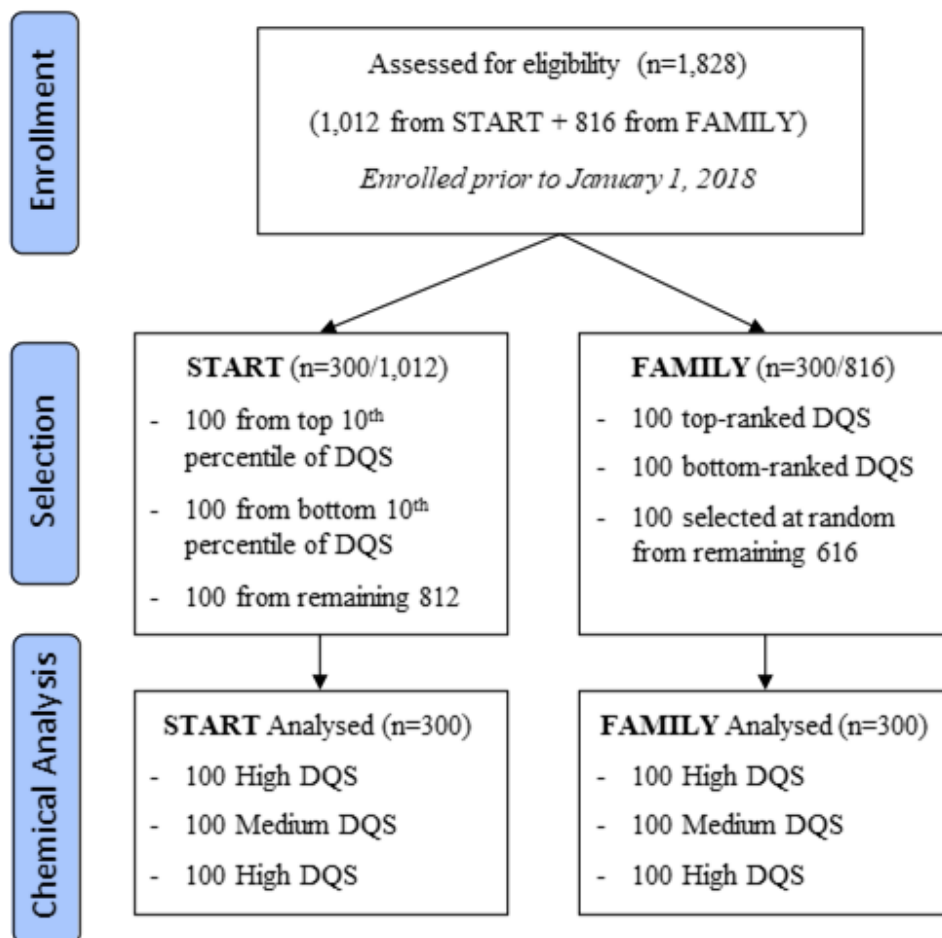

**Figure S1. Consort flow diagram outlining selection criteria used in a cross-sectional study involving participants from the FAMILY and START birth cohorts**



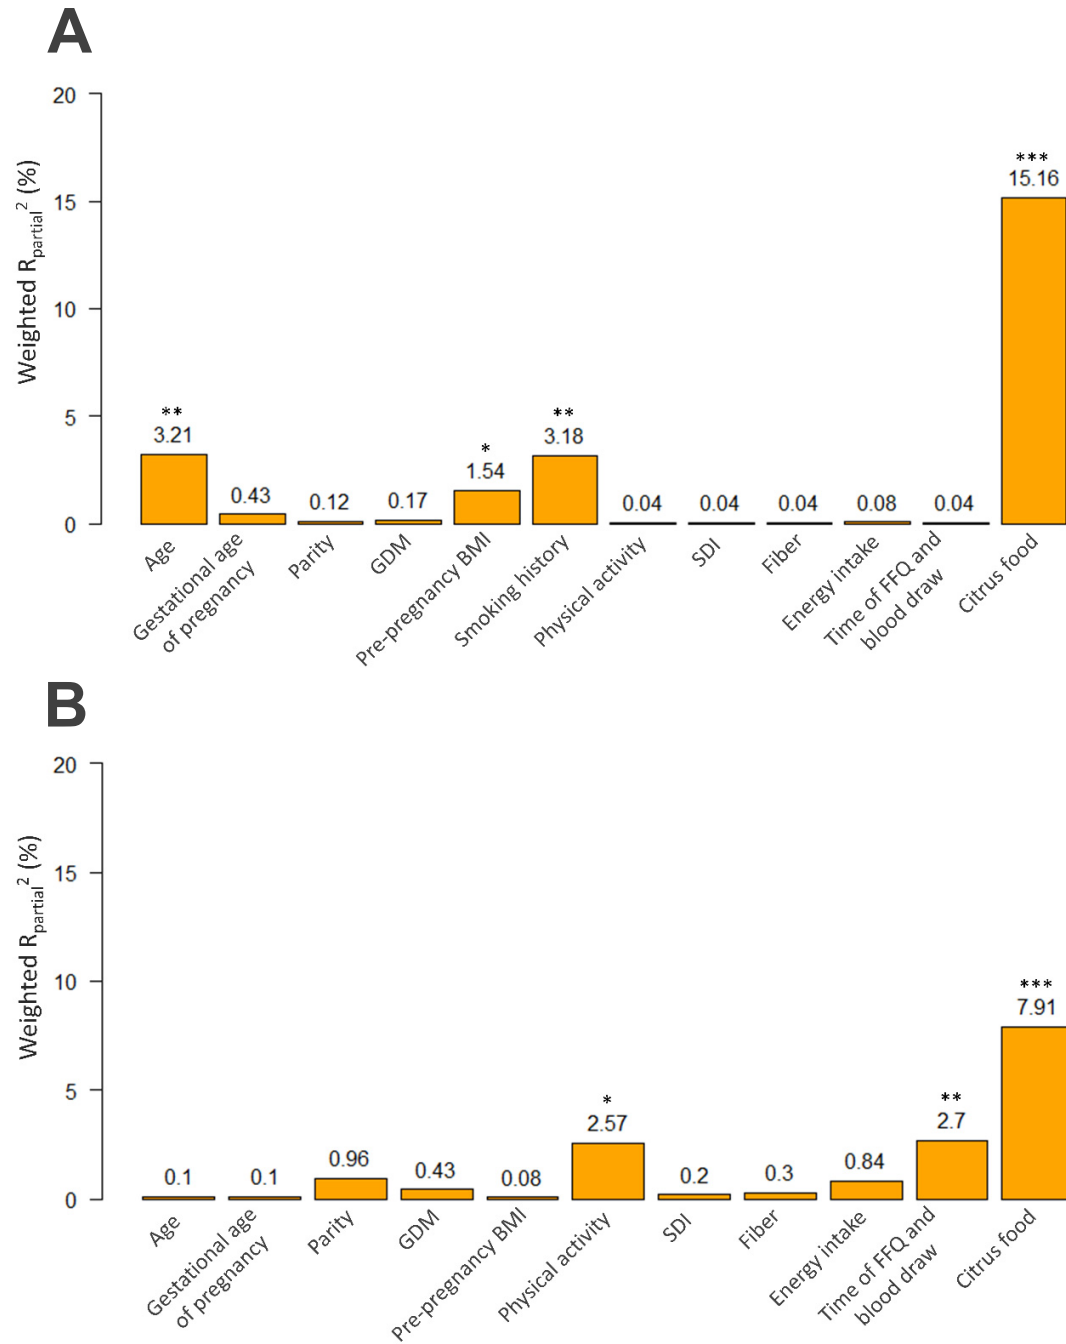

**Figure S2: Weighted  $R_{\text{partial}}^2$  for each factor showing the percentage of explained variability in Proline betaine in (A) FAMILY and (B) START cohort**

Statistical significance was based on hierarchical linear models. \*  $p \leq 0.05$ , \*\* $p \leq 0.01$ , \*\*\* $p \leq 0.001$

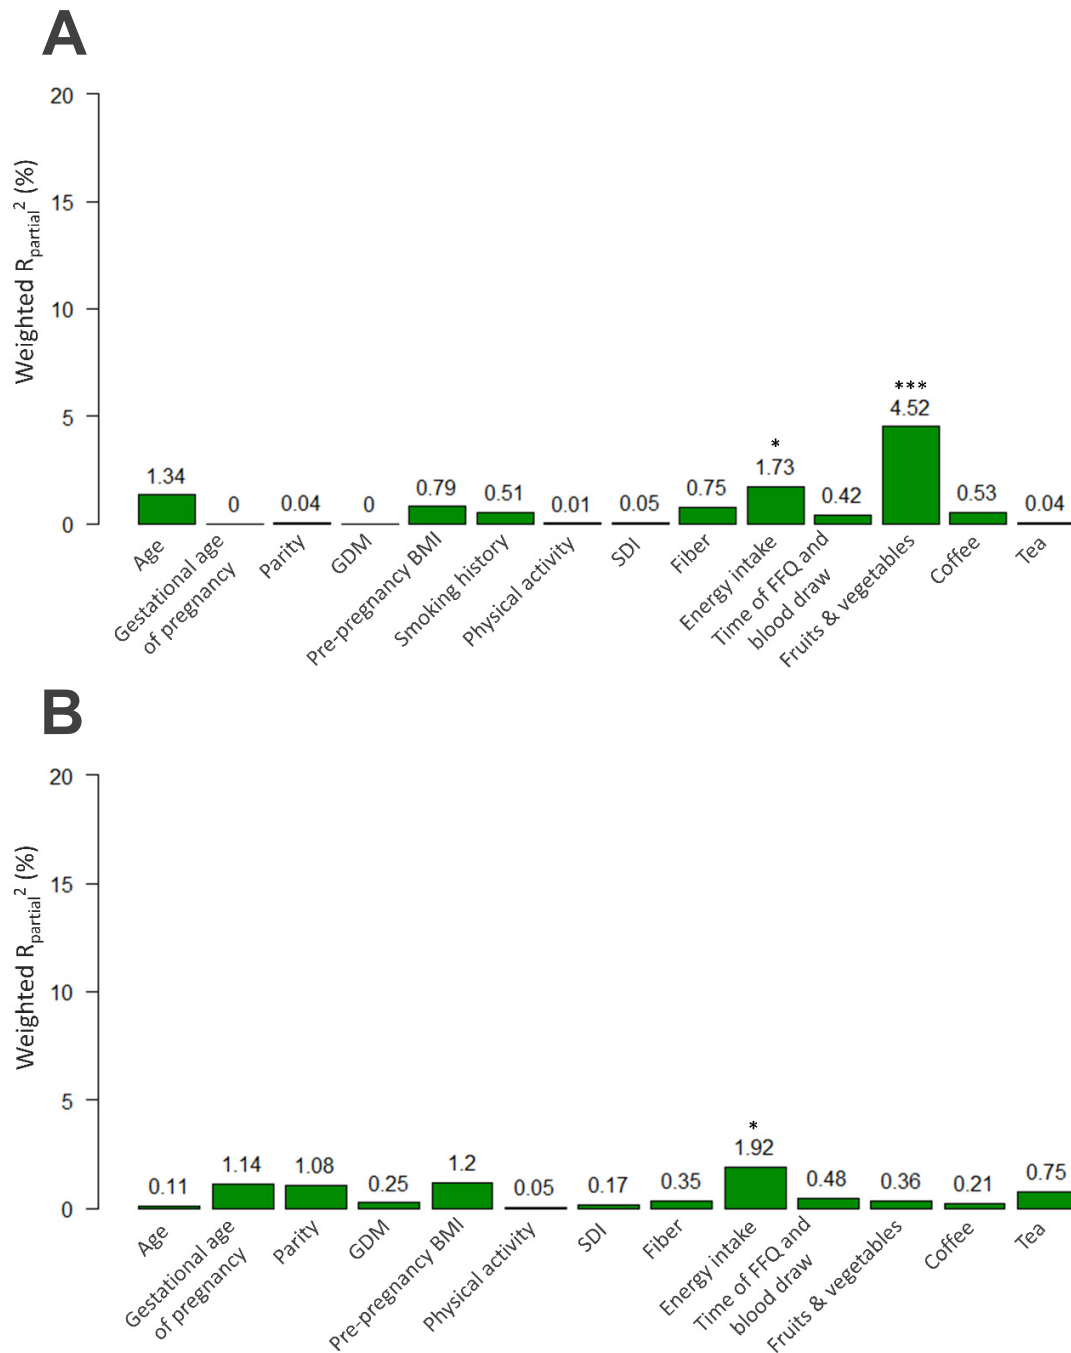

**Figure S3: Weighted  $R_{\text{partial}}^2$  for each factor showing the percentage of explained variability in Hippuric acid in (A) FAMILY and (B) START cohort**

Statistical significance was based on hierarchical linear models. \*  $p \leq 0.05$ , \*\*\* $p \leq 0.001$

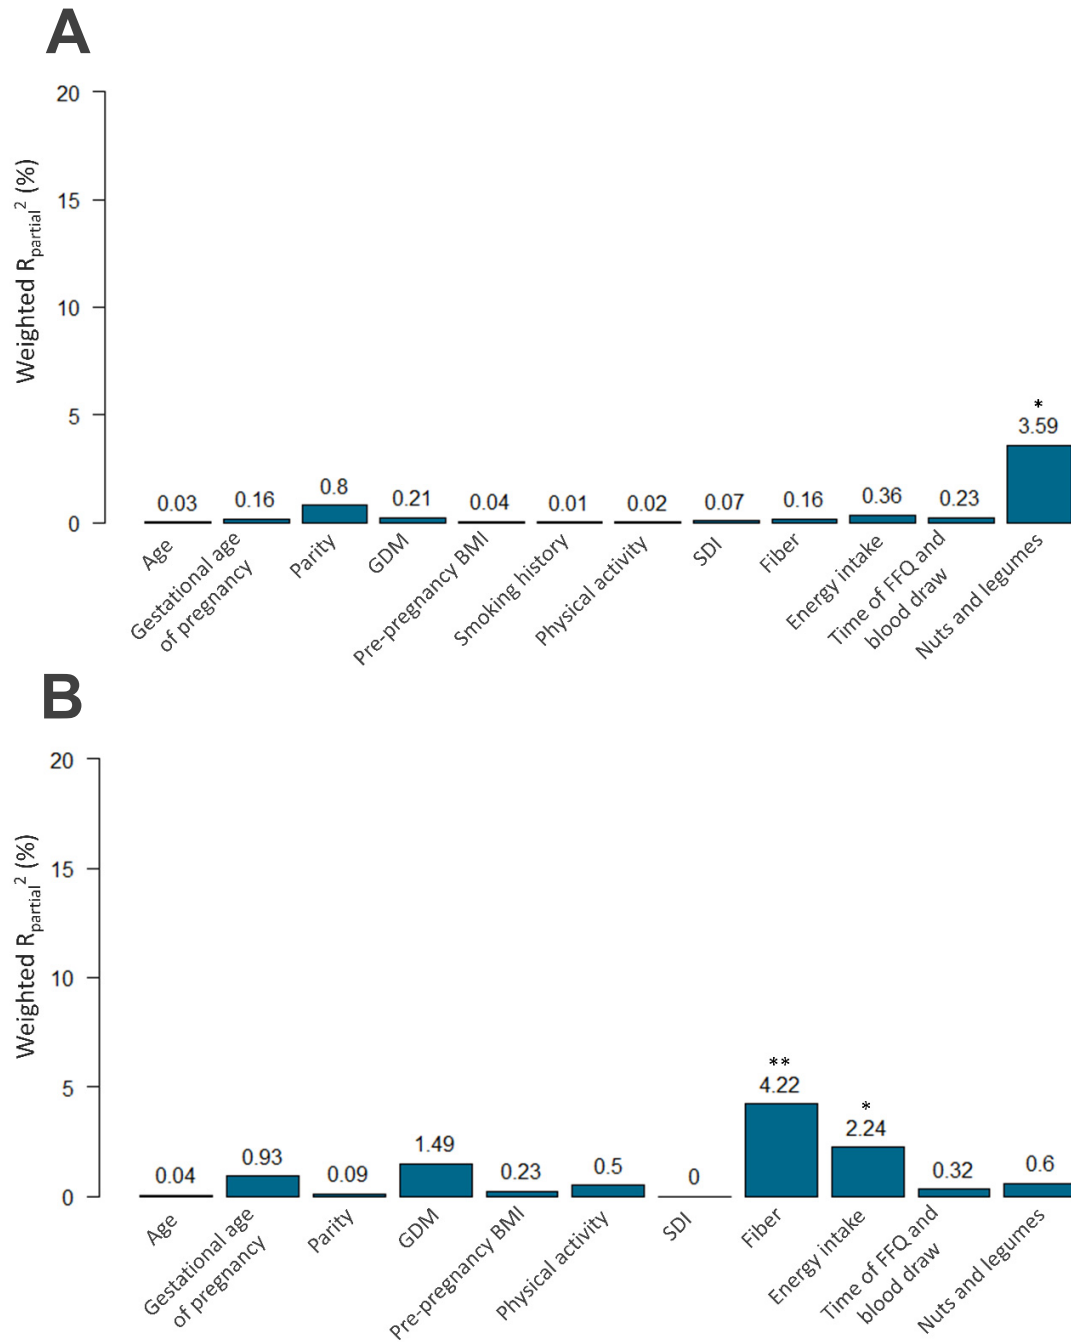

**Figure S4: Weighted  $R_{\text{partial}}^2$  for each factor showing the percentage of explained variability in Tryptophan betaine in (A) FAMILY and (B) START cohort**

Statistical significance was based on hierarchical linear models. \*  $p \leq 0.05$ , \*\* $p \leq 0.01$

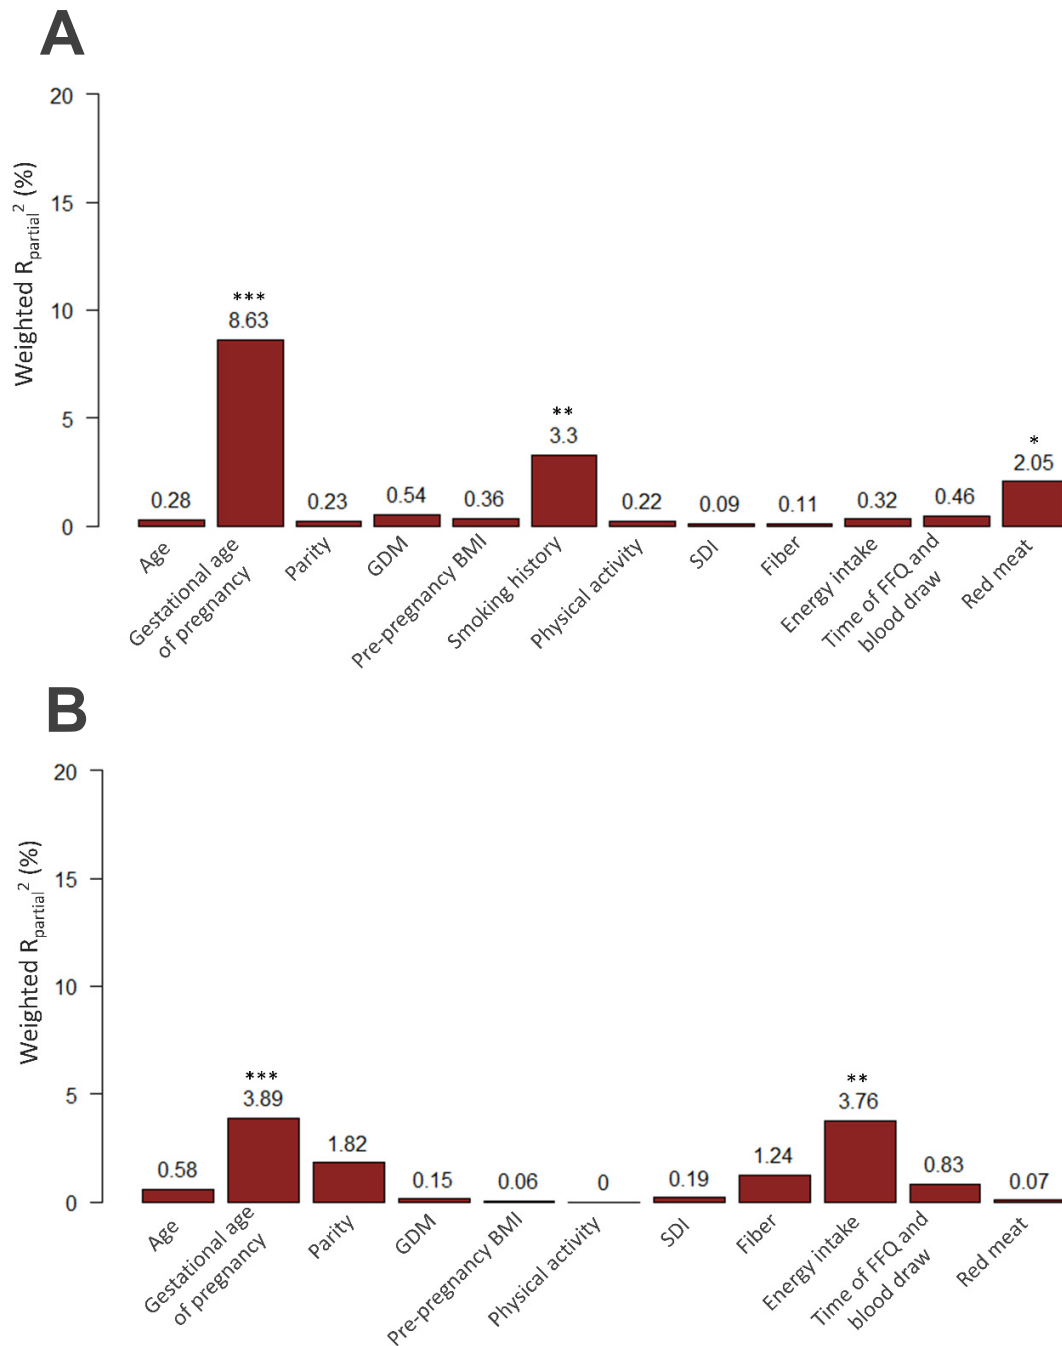

**Figure S5: Weighted  $R^2_{\text{partial}}$  for each factor showing the percentage of explained variability in Carnitine in (A) FAMILY and (B) START cohort**

Statistical significance was based on hierarchical linear models. \*  $p \leq 0.05$ , \*\* $p \leq 0.01$ , \*\*\* $p \leq 0.001$

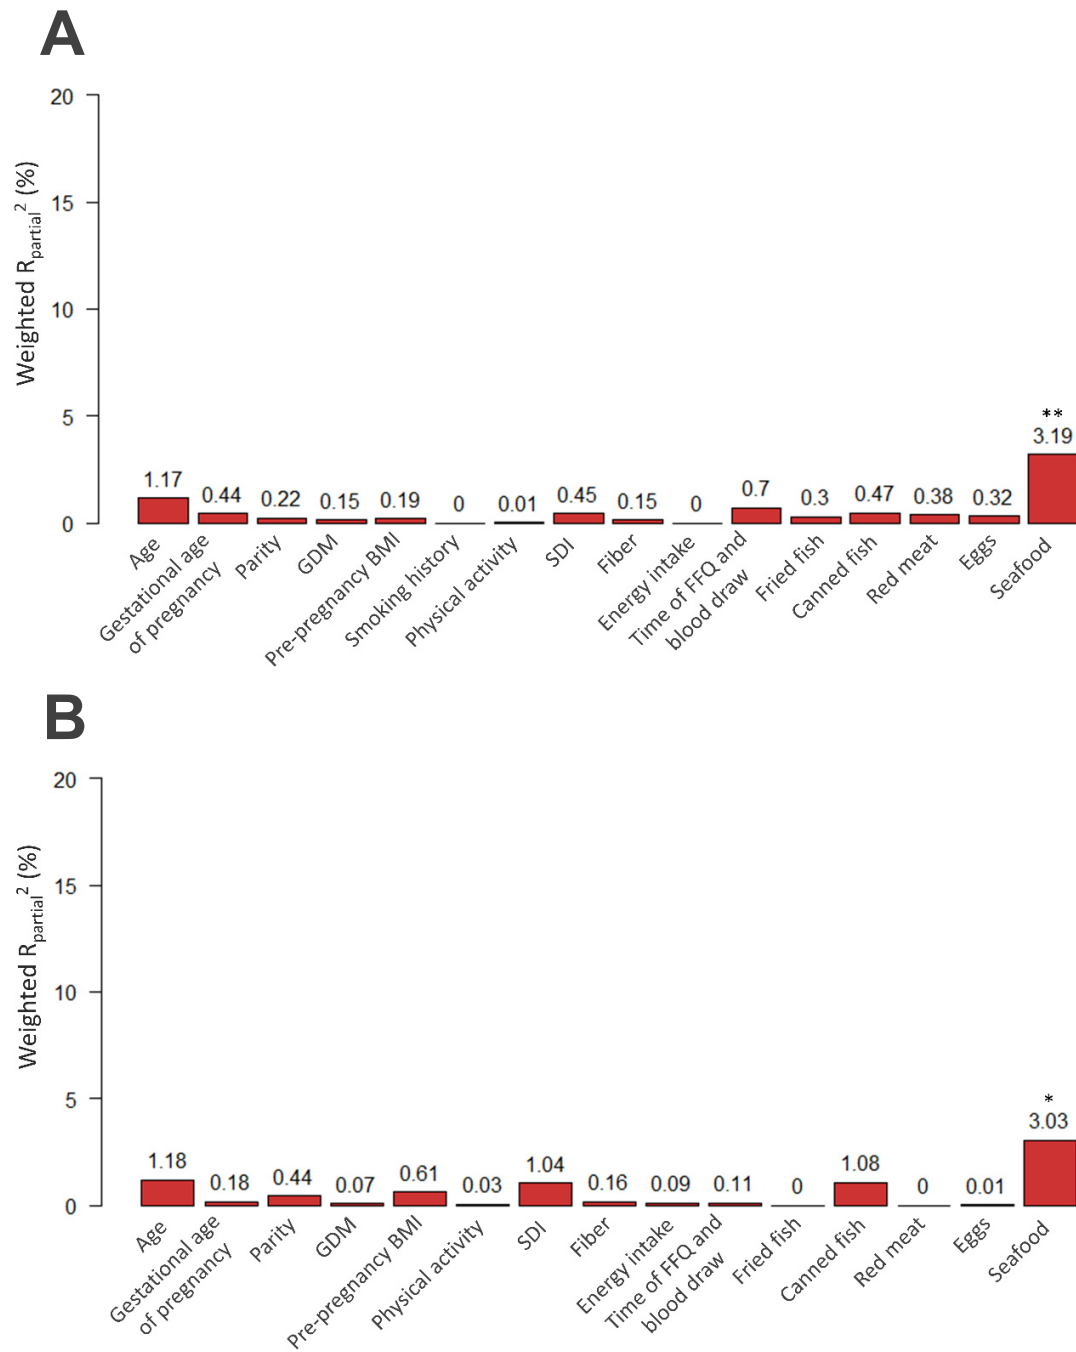

**Figure S6: Weighted  $R_{\text{partial}}^2$  for each factor showing the percentage of explained variability in trimethylamine *N*-oxide (TMAO) in (A) FAMILY and (B) START cohort**

Statistical significance was based on hierarchical linear models. \*  $p \leq 0.05$ , \*\* $p \leq 0.01$

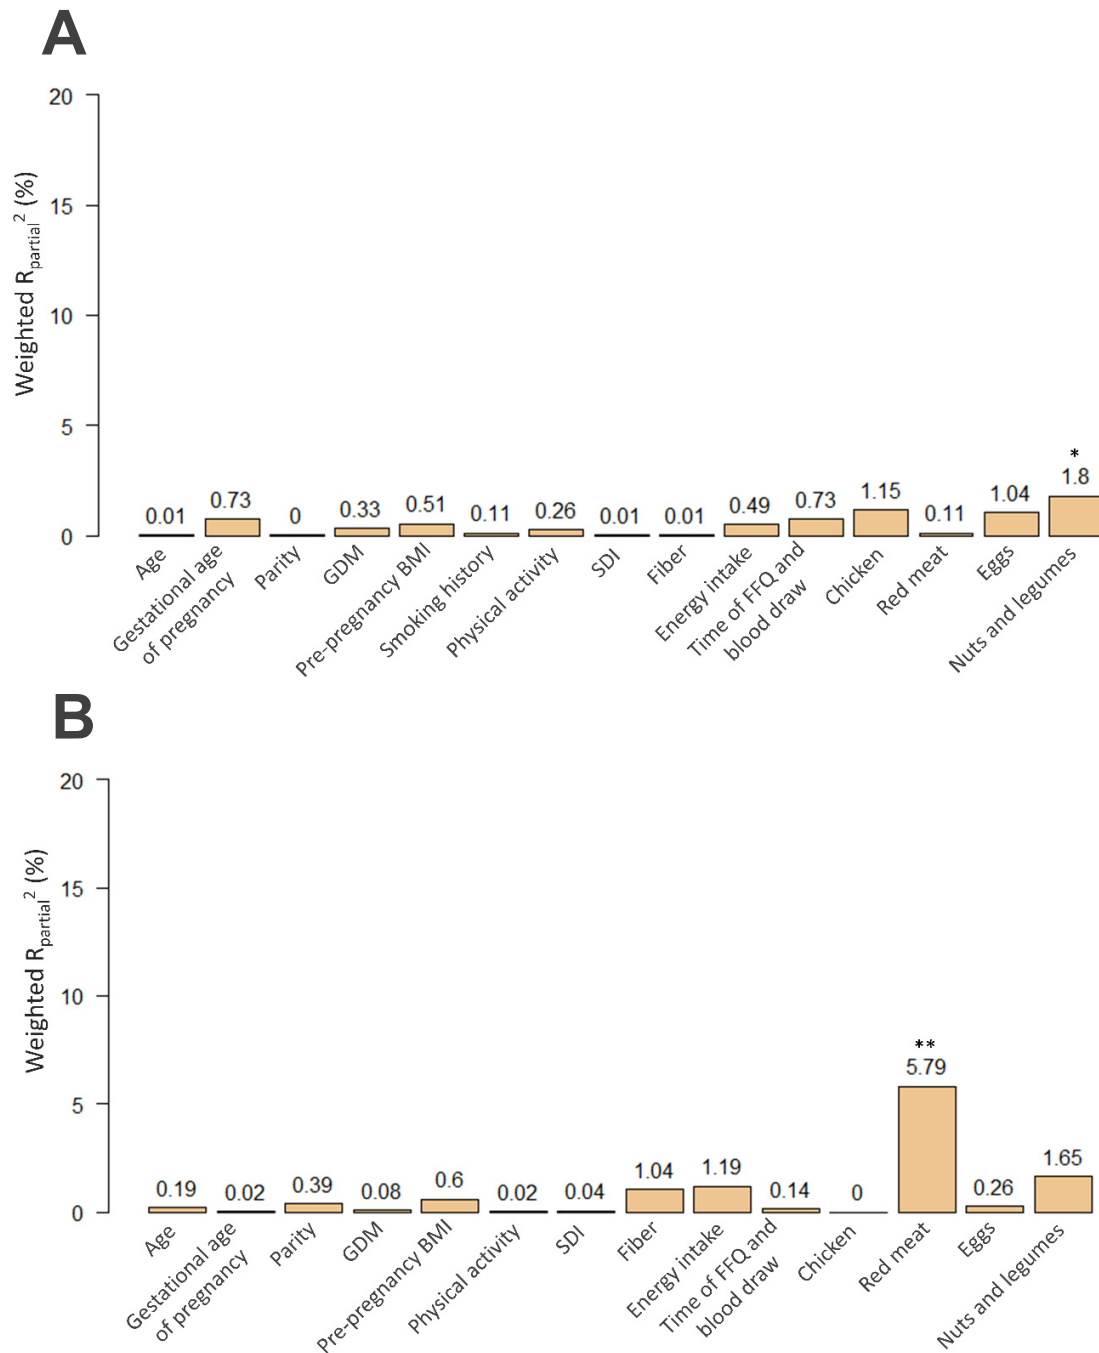

**Figure S7: Weighted  $R_{\text{partial}}^2$  for each factor showing the percentage of explained variability in 3-methylhistidine in (A) FAMILY and (B) START cohort**

Statistical significance was based on hierarchical linear models. \*  $p \leq 0.05$ , \*\* $p \leq 0.01$

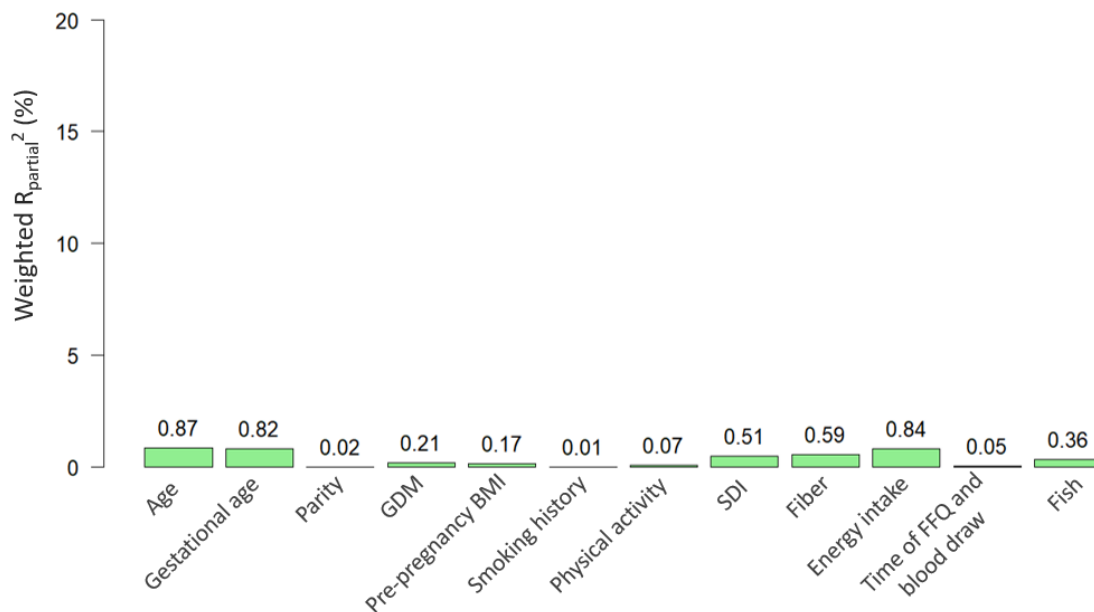

**Figure S8: Weighted  $R_{\text{partial}}^2$  for each factor showing the percentage of explained variability in Eicosapentaenoic acid (EPA, 20:5n-3) in FAMILY cohort**

Statistical significance was based on ordinary least squares regression.

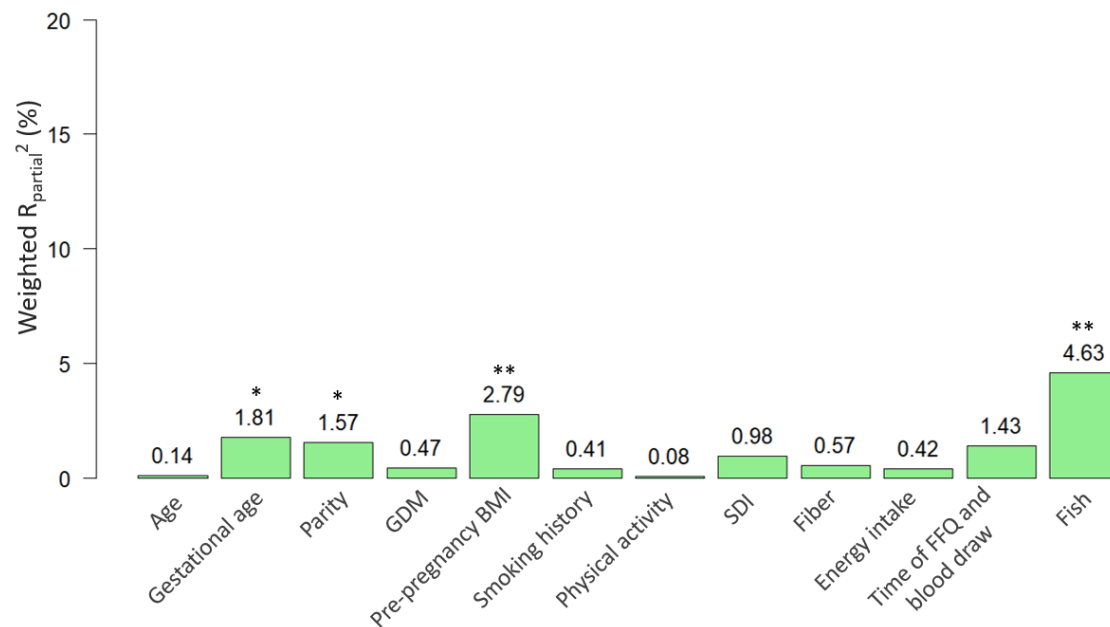

**Figure S9: Weighted  $R_{\text{partial}}^2$  for each factor showing the percentage of explained variability in Docosahexaenoic acid (DHA; 22:6n-3) in FAMILY cohort**

Statistical significance was based on ordinary least squares regression. \*  $p \leq 0.05$ , \*\* $p \leq 0.01$

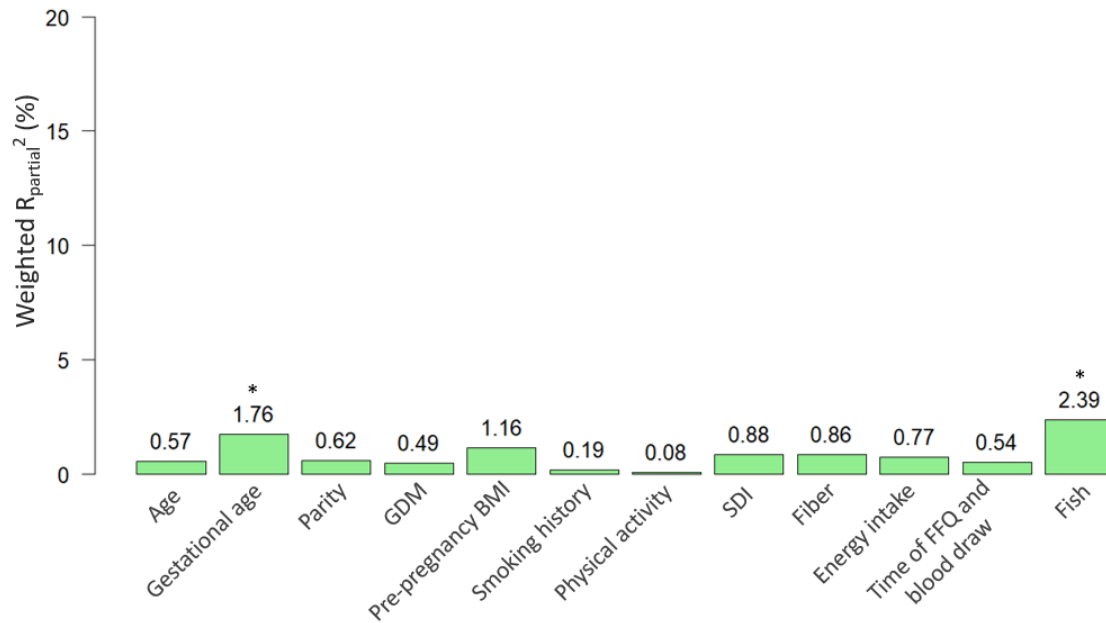

**Figure S10: Weighted  $R_{\text{partial}}^2$  for each factor showing the percentage of explained variability in EPA + DHA in FAMILY cohort**

Statistical significance was based on ordinary least squares regression. \*  $p \leq 0.05$



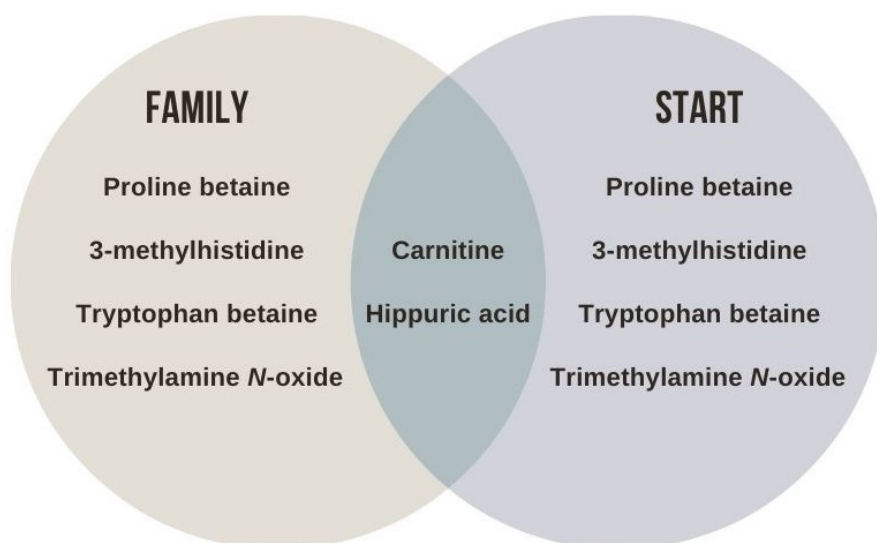

**Figure S11: Venn diagram showing overlap of serum metabolites based on the cluster effect by ethnicity/cohort**
